# Supplementary material for: Explanation and elaboration of the Standards for UNiversal reporting of patient Decision Aid Evaluations (SUNDAE) guidelines: examples of reporting SUNDAE items from patient decision aid evaluation literature
Source: PubMed Central journal article supplement — BMJ Qual Saf. 2018 Feb 21;27(5):389–412. doi: 10.1136/bmjqs-2017-006985 (PMC5965363; doi:10.1136/bmjqs-2017-006985), 2018-02-21
Supplement: bmjqs-2017-006985supp001.pdf [file bmjqs-2017-006985supp001.pdf]

## Appendix A: SUNDAE Checklist for evaluation studies of patient decision aids

| Section/Topic             | Page No.                                                                                       | Item No. | Checklist Item                                                                                                                                                                                                                                                                                                                                                                                                                                                                                                                                                                                                                                                                                                                                   |
|---------------------------|------------------------------------------------------------------------------------------------|----------|--------------------------------------------------------------------------------------------------------------------------------------------------------------------------------------------------------------------------------------------------------------------------------------------------------------------------------------------------------------------------------------------------------------------------------------------------------------------------------------------------------------------------------------------------------------------------------------------------------------------------------------------------------------------------------------------------------------------------------------------------|
| <b>Title and Abstract</b> | ___                                                                                            | 1        | Use the term patient decision aid in the abstract to identify the intervention evaluated and, if possible, in the title.                                                                                                                                                                                                                                                                                                                                                                                                                                                                                                                                                                                                                         |
|                           | ___                                                                                            | 2        | In the abstract, identify the main outcomes used to evaluate the patient decision aid.                                                                                                                                                                                                                                                                                                                                                                                                                                                                                                                                                                                                                                                           |
| <b>Introduction</b>       | <b>As part of standard introduction (the problem, gaps, purpose)</b>                           |          |                                                                                                                                                                                                                                                                                                                                                                                                                                                                                                                                                                                                                                                                                                                                                  |
|                           | ___                                                                                            | 3        | Describe the decision that is the focus of the patient decision aid.                                                                                                                                                                                                                                                                                                                                                                                                                                                                                                                                                                                                                                                                             |
|                           | ___                                                                                            | 4        | Describe the intended user(s) of the patient decision aid.                                                                                                                                                                                                                                                                                                                                                                                                                                                                                                                                                                                                                                                                                       |
|                           | ___                                                                                            | 5        | Summarize the need for the patient decision aid under evaluation.                                                                                                                                                                                                                                                                                                                                                                                                                                                                                                                                                                                                                                                                                |
|                           | ___                                                                                            | 6        | Describe the purpose of the evaluation study with respect to the patient decision aid.                                                                                                                                                                                                                                                                                                                                                                                                                                                                                                                                                                                                                                                           |
| <b>Methods</b>            | <b>Studies with a comparator should also address Items 7-13 for the comparator if possible</b> |          |                                                                                                                                                                                                                                                                                                                                                                                                                                                                                                                                                                                                                                                                                                                                                  |
|                           | ___                                                                                            | 7        | Briefly describe the development process for the patient decision aid (and any comparator), or cite other documents that describe the development process. At a minimum include: <ul style="list-style-type: none"> <li>• Participation of stakeholders in its development</li> <li>• The process for gathering, selecting and appraising evidence to inform its content</li> <li>• Any testing that was done</li> </ul>                                                                                                                                                                                                                                                                                                                         |
|                           | ___                                                                                            | 8        | Identify the patient decision aid evaluated in the study (and any comparator) by including: <ul style="list-style-type: none"> <li>• Name or information that enables it to be identified</li> <li>• Date and/or version number</li> <li>• How it can be accessed, if available</li> </ul>                                                                                                                                                                                                                                                                                                                                                                                                                                                       |
|                           | ___                                                                                            | 9        | Describe the format(s) of the patient decision aid (and any comparator) (e.g. paper, online, video).                                                                                                                                                                                                                                                                                                                                                                                                                                                                                                                                                                                                                                             |
|                           | ___                                                                                            | 10       | List the options presented in the patient decision aid (and any comparator).                                                                                                                                                                                                                                                                                                                                                                                                                                                                                                                                                                                                                                                                     |
|                           | ___                                                                                            | 11       | Indicate the components in the patient decision aid (and any comparator) including: <ul style="list-style-type: none"> <li>• Explicit description of the decision*</li> <li>• Description of health problem*</li> <li>• Information on options and their benefits, harms, and consequences*</li> <li>• Values clarification (implicit or explicit)*</li> <li>• Numerical probabilities</li> <li>• Tailoring of information or probabilities</li> <li>• Guidance in deliberation</li> <li>• Guidance in communication</li> <li>• Personal stories</li> <li>• Reading level or other strategies to help understanding</li> <li>• Other components</li> </ul> <p>*These components are needed to meet the definition of a patient decision aid.</p> |
|                           | ___                                                                                            | 12       | Briefly describe the components from Item 11 that are included in the patient decision aid (and any comparator) or cite other documents that describe the components.                                                                                                                                                                                                                                                                                                                                                                                                                                                                                                                                                                            |

| Section/Topic               | Page No.                                                                                                                  | Item No.                                                                                                                                                                                                                                         | Checklist Item                                                                                                                                                                                                                                                                                                                                                                                                                                 |
|-----------------------------|---------------------------------------------------------------------------------------------------------------------------|--------------------------------------------------------------------------------------------------------------------------------------------------------------------------------------------------------------------------------------------------|------------------------------------------------------------------------------------------------------------------------------------------------------------------------------------------------------------------------------------------------------------------------------------------------------------------------------------------------------------------------------------------------------------------------------------------------|
| <b>Methods (cont.)</b>      | ___                                                                                                                       | 13                                                                                                                                                                                                                                               | Describe the delivery of the patient decision aid (and any comparator) including: <ul style="list-style-type: none"> <li>• How it was delivered (e.g. by whom and/or by what method)</li> <li>• To whom it was delivered</li> <li>• Where it was used</li> <li>• When it was used in the pathway of care</li> <li>• Any training to support delivery</li> <li>• Setting characteristics and system factors influencing its delivery</li> </ul> |
|                             | ___                                                                                                                       | 14                                                                                                                                                                                                                                               | Describe any methods used to assess the degree to which the patient decision aid was delivered and used as intended (also known as fidelity).                                                                                                                                                                                                                                                                                                  |
|                             | ___                                                                                                                       | 15                                                                                                                                                                                                                                               | Describe any methods used to understand how and why the patient decision aid works (also known as process evaluation) or cite other documents that describe the methods.                                                                                                                                                                                                                                                                       |
|                             | ___                                                                                                                       | 16                                                                                                                                                                                                                                               | Identify theories, models or frameworks used to guide the design of the evaluation and selection of study measures.                                                                                                                                                                                                                                                                                                                            |
|                             | ___                                                                                                                       | 17                                                                                                                                                                                                                                               | For all study measures used to assess the impact of the patient decision aid on patients, health professionals, organization, and health system: <ul style="list-style-type: none"> <li>• Identify the measures</li> <li>• Indicate the timing of administration in relation to exposure to the patient decision aid and health care interventions</li> </ul>                                                                                  |
|                             | ___                                                                                                                       | 18                                                                                                                                                                                                                                               | For any instruments used: <ul style="list-style-type: none"> <li>• Name the instrument and the version (if applicable)</li> <li>• Briefly describe the psychometric properties, or cite other documents</li> </ul>                                                                                                                                                                                                                             |
| <b>Results</b>              | <b>In addition to standard reporting of results</b>                                                                       |                                                                                                                                                                                                                                                  |                                                                                                                                                                                                                                                                                                                                                                                                                                                |
| ___                         | 19                                                                                                                        | Describe the characteristics of the patient, family, and carer population(s) (e.g. health literacy, numeracy, prior experience with treatment options) that may affect patient decision aid outcomes.                                            |                                                                                                                                                                                                                                                                                                                                                                                                                                                |
| ___                         | 20                                                                                                                        | Describe any characteristics of the participating health professionals (e.g. relevant training, usual care vs. study professional, role in decision making) that may affect decision aid outcomes.                                               |                                                                                                                                                                                                                                                                                                                                                                                                                                                |
| ___                         | 21                                                                                                                        | Report any results on the use of the patient decision aid: <ul style="list-style-type: none"> <li>• How much and which components were used</li> <li>• Degree to which it was delivered and used as intended (also known as fidelity)</li> </ul> |                                                                                                                                                                                                                                                                                                                                                                                                                                                |
| ___                         | 22                                                                                                                        | Report relevant results of any analyses conducted to understand how and why the patient decision aid works (also known as process evaluation).                                                                                                   |                                                                                                                                                                                                                                                                                                                                                                                                                                                |
| ___                         | 23                                                                                                                        | Report any unanticipated positive or negative consequences of the patient decision aid.                                                                                                                                                          |                                                                                                                                                                                                                                                                                                                                                                                                                                                |
| <b>Discussion</b>           | <b>As part of the standard discussion section (summary of key findings, interpretation, limitations and conclusions):</b> |                                                                                                                                                                                                                                                  |                                                                                                                                                                                                                                                                                                                                                                                                                                                |
| ___                         | 24                                                                                                                        | Discuss whether the patient decision aid worked as intended and interpret the results taking into account the specific context of the study including any process evaluation.                                                                    |                                                                                                                                                                                                                                                                                                                                                                                                                                                |
| ___                         | 25                                                                                                                        | Discuss any implications of the results for patient decision aid development, research, implementation, and theory, frameworks or models.                                                                                                        |                                                                                                                                                                                                                                                                                                                                                                                                                                                |
| <b>Conflict of Interest</b> | ___                                                                                                                       | 26                                                                                                                                                                                                                                               | All study authors should disclose if they have an interest (professional, financial or intellectual) in any of the options included in the patient decision aid or a financial interest in the decision aid itself.                                                                                                                                                                                                                            |
